## RESEARCH ARTICLE

# Safety and efficacy of antioxidant therapy in children and adolescents with attention deficit hyperactivity disorder: A systematic review and network meta-analysis

Peike Zhou \*, Xiaohui Yu, Tao Song, Xiaoli Hou

Department of Pediatrics, Affiliated ZhongShan Hospital of Dalian University, Dalian, Liaoning, China

\* [zhoupeike@s.dlu.edu.cn](mailto:zhoupeike@s.dlu.edu.cn)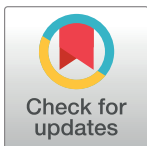

## Abstract

### Objective

To systematically evaluate the safety and efficacy of antioxidant therapy in children and adolescents with attention deficit hyperactivity disorder (ADHD).

### Methods

Randomized controlled trials and prospective studies on antioxidant therapy in children and adolescents with ADHD were searched in PubMed, Embase, and Cochrane Library from the inception of databases to November 12, 2022. Two investigators independently screened the literature, extracted data, and evaluated the quality of the included studies. Network meta-analysis (PROSPERO registration number CRD 42023382824) was carried out by using R Studio 4.2.1.

### Results

48 studies involving 12 antioxidant drugs (resveratrol, pycnogenol, omega-3, omega-6, quercetin, phosphatidylserine, almond, vitamin D, zinc, folic acid, ginkgo biloba, Acetyl-L-carnitine) were finally included, with 3,650 patients. Network meta-analysis showed that omega-6 (0.18), vitamin D (0.19), and quercetin (0.24) were the top three safest drugs according to SUCRA. The omega-3 (SUCRA 0.35), pycnogenol (SUCRA 0.36), and vitamin D (SUCRA 0.27) were the most effective in improving attention, hyperactivity, and total score of Conners' parent rating scale (CPRS), respectively. In terms of improving attention, hyperactivity, and total score of Conners' teacher rating scale (CTRS), pycnogenol (SUCRA 0.32), phosphatidylserine+omega-3 (SUCRA 0.26), and zinc (SUCRA 0.34) were the most effective, respectively. In terms of improving attention, hyperactivity and total score of ADHD Rating Scale-Parent, the optimal agents were phosphatidylserine (SUCRA 0.39), resveratrol+MPH (SUCRA 0.24), and phosphatidylserine (SUCRA 0.34), respectively. In terms of improving attention, hyperactivity and total score of ADHD Rating Scale-Teacher, pycnogenol (SUCRA 0.32), vitamin D (SUCRA 0.31) and vitamin D (SUCRA 0.18) were the

## OPEN ACCESS

**Citation:** Zhou P, Yu X, Song T, Hou X (2024) Safety and efficacy of antioxidant therapy in children and adolescents with attention deficit hyperactivity disorder: A systematic review and network meta-analysis. PLoS ONE 19(3): e0296926. <https://doi.org/10.1371/journal.pone.0296926>

**Editor:** Cristina Deppermann Fortes, Istituto Dermopatico dell'Immacolata, IDI-IRCCS, ITALY

**Received:** April 26, 2023

**Accepted:** December 22, 2023

**Published:** March 28, 2024

**Copyright:** © 2024 Zhou et al. This is an open access article distributed under the terms of the [Creative Commons Attribution License](https://creativecommons.org/licenses/by/4.0/), which permits unrestricted use, distribution, and reproduction in any medium, provided the original author and source are credited.

**Data Availability Statement:** All relevant data are within the manuscript and its [Supporting information](#) files.

**Funding:** The author(s) received no specific funding for this work.

**Competing interests:** The authors have declared that no competing interests exist.

optimal agents, respectively. The response rate of omega-3+6 was the highest in CGI (SUCRA 0.95) and CPT (SUCRA 0.42).

## Conclusion

The rankings of safety and efficacy of the 12 antioxidants vary. Due to the low methodological quality of the included studies, the probability ranking cannot fully explain the clinical efficacy, and the results need to be interpreted with caution. More high-quality studies are still needed to verify our findings.

## Introduction

Attention deficit hyperactivity disorder (ADHD) is a persistent neurodevelopmental condition that typically occurs in childhood and often persists into adulthood [1]. It is associated with various behavioral challenges during childhood, and the extent of these challenges can serve as an independent predictor of antisocial personality disorder in adulthood [2]. Consequently, effectively managing behavioral issues in children can help alleviate the future burden on both families and society at large [3]. The etiology of ADHD is still unclear and may be attributable to the complex interactions between multiple factors [4–6].

ADHD is influenced by both genetic and environmental factors [7]. Genetic susceptibility is uncontrollable, and a bad social and family environment also increases the risk of behavioral problems [8, 9]. ADHD is related to prenatal smoking and exposure to toxic substances [10, 11]. Harmful environments can significantly increase reactive oxygen species (ROS) levels in patients [12]. Psychological factors can also induce ADHD [13]. Adverse experiences in early childhood or school age can lead to emotional problems such as anxiety and depression, which gradually develop into ADHD in adolescence [14–16]. A study has found obvious changes in levels of reactive oxidation products in patients with anxiety [17]. The total oxidant status (TOS) and oxidative stress index (OSI) were higher in depressed patients [18]. In addition, dopamine, the major neurotransmitter responsible for ADHD [19], has also been reported to be affected by ROS levels [20, 21]. These studies indicate that oxidative stress may be one of the potential biological mechanisms leading to ADHD. Oxidative stress disrupts the structure and function of neurons in the prefrontal lobe of the brain [22]. Structural and functional impairments in the prefrontal cortex have been shown to be highly correlated with behavioral and emotional problems of ADHD [23]. Therefore, the application of antioxidant therapy is gradually accepted in clinical practice.

While first-line drug therapies, such as the central stimulant MPH, can effectively manage certain behavioral problems, they may induce numerous adverse reactions and cause long-term drug dependence [24, 25]. Non-pharmacological interventions, such as cognitive behavioral therapy (CBT), have also demonstrated their effectiveness [13]. However, they are associated with extended treatment durations and an increased financial burden on families. Consequently, safer and more cost-effective antioxidant options are needed.

Currently, a variety of antioxidant drugs are used in the treatment of children and adolescents with ADHD. Nevertheless, these drugs vary in their therapeutic mechanisms and lack direct comparisons. Therefore, this study employs a network meta-analysis approach to compare the safety and effectiveness of commonly utilized antioxidant drugs in clinical practice. The aim is to provide an evidence-based foundation for the selection of superior antioxidant medications in clinical settings.

## Data and method

This systematic review adheres rigorously to the PRISMA Guideline [26] (S1 Checklist) and follows the Cochrane System Review Manual [27]. It is registered with PROSPERO under the registration number CRD 42023382824 (S1 File).

### Inclusion criteria

The inclusion criteria were meticulously defined in accordance with the PICOS principles: (1) Subjects: The study included children and adolescents with ADHD who met the diagnostic criteria of DSM-III/IV/5 [28] or were clinically diagnosed. The age of the participants was 18 years or younger, without regard to gender. (2) Intervention Measures: The experimental group received antioxidant drugs, including but not limited to quercetin, ginkgo, zinc, vitamins, unsaturated fatty acids, and folic acid. The minimum treatment duration was set at 2 weeks. The control group was treated with either a placebo, MPH, or antioxidants alone, or in combination. There were no restrictions on the route of administration, dosing, or treatment regimen. (3) Primary Outcome Indicators: The primary outcomes included safety and efficacy assessments. Safety was determined by monitoring the number of adverse events (comprising all adverse symptoms reported from the beginning to the end of the study). Efficacy was evaluated using Conners' parent rating scale (CPRS), Conners' teacher rating scale (CTRS), ADHD rating scale-parent (ADHD RS-Parent), and ADHD rating scale-teacher (ADHD RS-Teacher), which encompassed assessments of attention, hyperactivity, and total scores. Additionally, secondary outcome indicators such as the Clinical Global Impressions scale (CGI) and Continuous Performance Test (CPT) were also employed to gauge effectiveness (S8 Table). (4) Study Type: The study considered randomized controlled trials and prospective studies.

### Exclusion criteria

The exclusion criteria were as follows: (1) Patients suffered from other serious diseases, such as epilepsy or systemic lupus erythematosus; (2) Antioxidant drugs were obtained from daily diet rather than drug supplements; (3) Antioxidant drugs combined with other non-drug treatments were taken as an intervention (e.g. behavioral therapy, mindfulness intervention [29]); (4) Self-control study, review or mechanistic study.

### Search strategy

A computerized search was conducted in the PubMed, Embase, and Cochrane Library databases from the inception of the databases to November 12, 2022. The search terms included ('Attention Deficit Hyperactivity Disorder' OR 'ADHD') AND ('children' OR 'Adolescent') AND ('Antioxidants' OR 'Unsaturated Fatty Acids' OR 'Zinc' OR 'pycnogenols' OR 'vitamin' OR 'Quercetin' OR 'Ginkgo'). The detailed search strategy is provided in S1 Table. Additionally, manual searches of references in the included studies were conducted. There were no language restrictions.

### Literature screening and data extraction

Two investigators independently screened literature using Endnote 20. They then proceeded to extract, encode, and cross-verify the data using Excel. In the event of any discrepancies or disagreements, a third investigator was consulted to facilitate consensus. The following information was extracted from the literature: title, author(s), publication year, study type, follow-up duration, participant count, treatment details (including medication and daily dosage), and

evaluation outcomes. The baseline and endpoint data in trials were extracted. In cases where multiple time points were reported, the average value was extracted for analysis.

### Evaluation of risk of bias

Two investigators meticulously assessed the risk of bias for the included studies, strictly adhering to the Cochrane risk-of-bias tool. This tool comprises seven key items: random allocation, allocation concealment, blinding of intervention for both participants and medical staff, blinding of outcome assessment, integrity of result data, selective reporting of study outcomes, and potential sources of other bias. Each of these items was graded as either low risk, unclear, or high risk.

### Statistical analysis

The netmeta packages [127] in software R studio 4.2.1 was used to generate evidence network and probability ranking to present the direct and indirect comparison between different interventions. Network meta-analysis and heterogeneity test were carried out as part of the analysis. An  $I^2$  value of 50% was established as the critical threshold for selecting the appropriate effects model [128]. An  $I^2 \leq 50\%$  indicated minimal heterogeneity, and the fixed-effects model was employed; otherwise, the random-effects model was chosen. Consistency between direct and indirect evidence was assessed using the nodal analysis method. Continuous variables were presented as mean differences (MD), and dichotomous variables were expressed as odds ratios (OR) along with 95% credibility intervals (CrI). To rank each intervention, the surface under the cumulative ranking curve (SUCRA) was utilized. The SUCRA value ranges from 0 to 1 [30]. The closer the value is to 0, the lower the probability of an event. Meanwhile, the closer the value is to 1, the higher the probability (S8 Table).

## Results

### Basic information on the included studies

Following the search strategy, a total of 2,939 studies were initially identified. After eliminating 683 duplicate records across various databases, the titles and abstracts of the remaining 2,203 studies were reviewed to exclude irrelevant studies, such as guidelines, reviews, animal experiments, and case reports. Subsequently, after a detailed examination of the full texts, 5 studies that lacked outcome indicators were excluded. Ultimately, 48 studies were included in the analysis [31–78], encompassing a total of 3,650 children. Among them, 1,930 cases were in the experimental group, and 1,720 cases were in the control group. These studies involved 12 antioxidant drugs, namely resveratrol, pycnogenol, unsaturated fatty acids (omega-3 and omega-6), quercetin, phosphatidylserine, almond, vitamin D, zinc, folic acid, ginkgo, and Acetyl-L-carnitine. The literature screening process is illustrated in Fig 1, and detailed information about the included studies can be found in S2 and S6 Tables.

### Safety

**Evidence network and consistency test.** In the evidence network depicted in Fig 2, each node represents an intervention measure, and the thickness of the lines connecting nodes is proportional to the number of studies that involved those interventions. There were closed loops, necessitating nodal analysis to assess consistency. The evidence network encompassed 12 antioxidant drugs, involving a total of 3,141 patients from 41 studies. The closed loops primarily involved quercetin, zinc, omega-3, omega-6, phosphatidylserine, MPH, and placebo, both alone and in combination, forming ten groups for pairwise comparisons. Nodal analysis

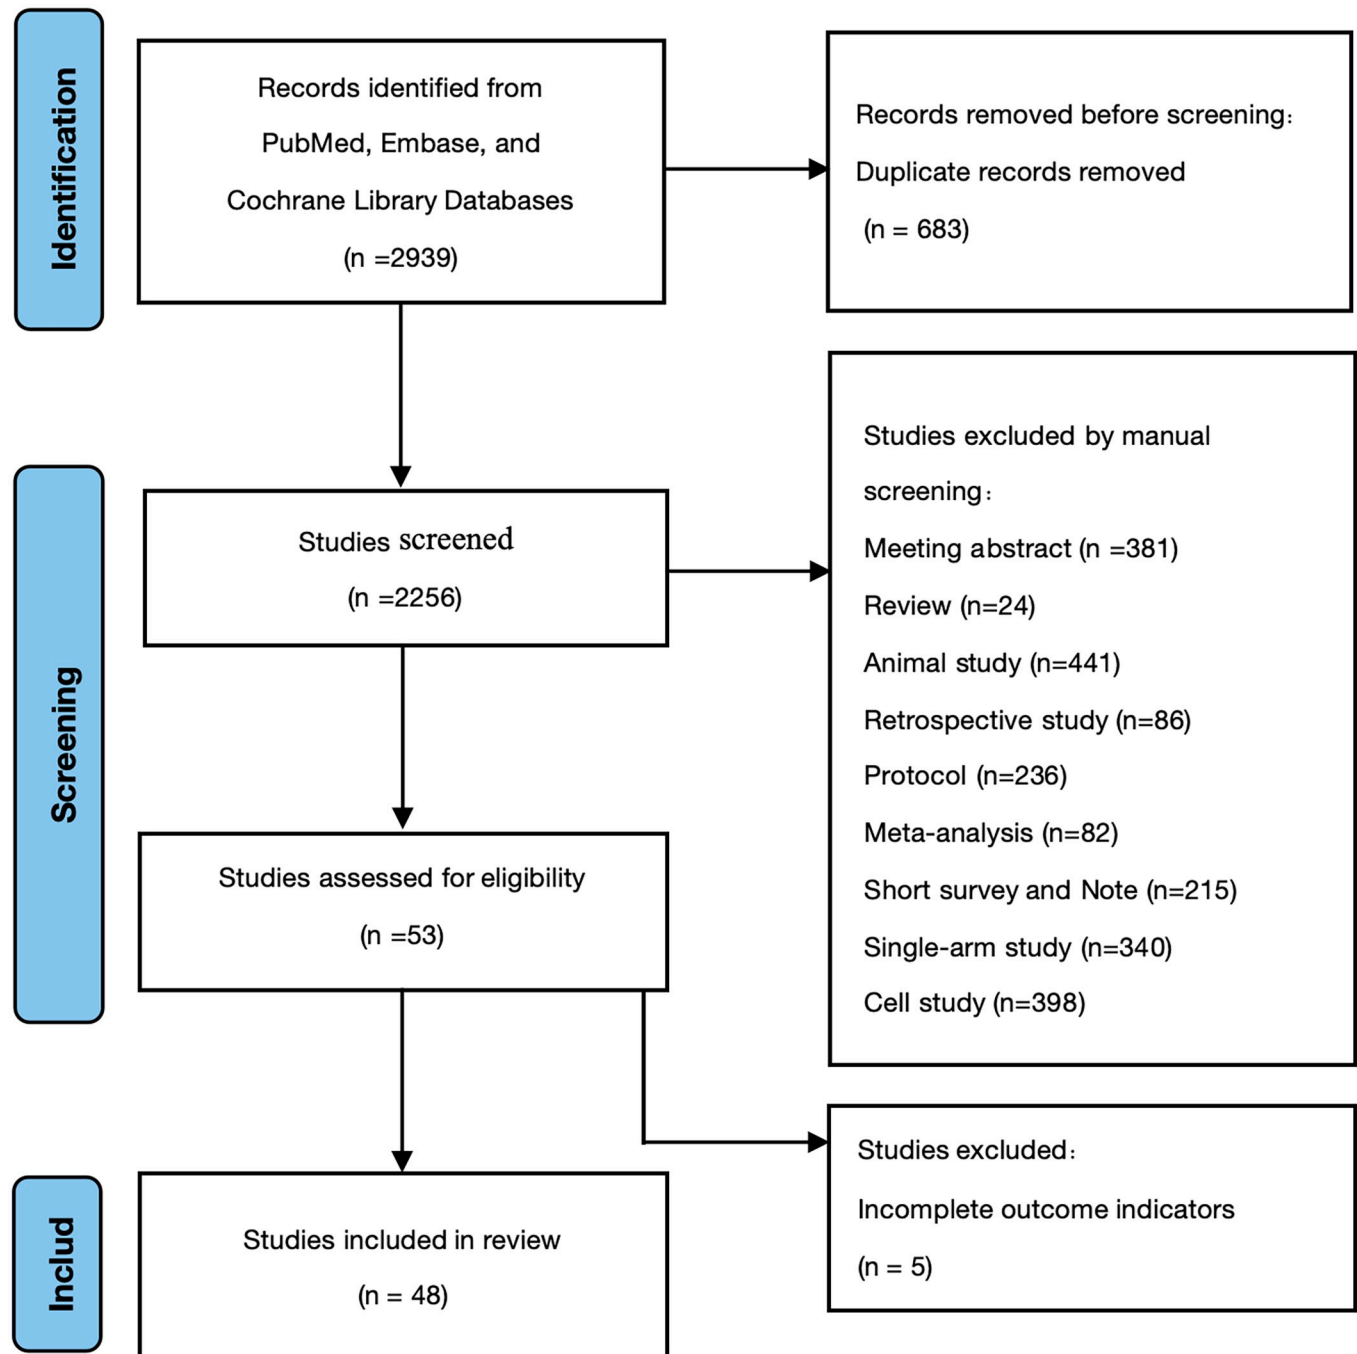

Fig 1. Flow diagram for study selection process.

<https://doi.org/10.1371/journal.pone.0296926.g001>

confirmed the consistency between the results of indirect comparisons and direct comparisons (S1A Fig). Importantly, these comparisons did not reveal statistically significant differences ( $P \geq 0.05$ ), underscoring the reliability of the results from the network meta-analysis.

**Heterogeneity test and network meta-analysis.** Heterogeneity test results showed that there was no significant heterogeneity ( $I^2 < 50\%$ ) among the studies (S2A Fig). Therefore, the

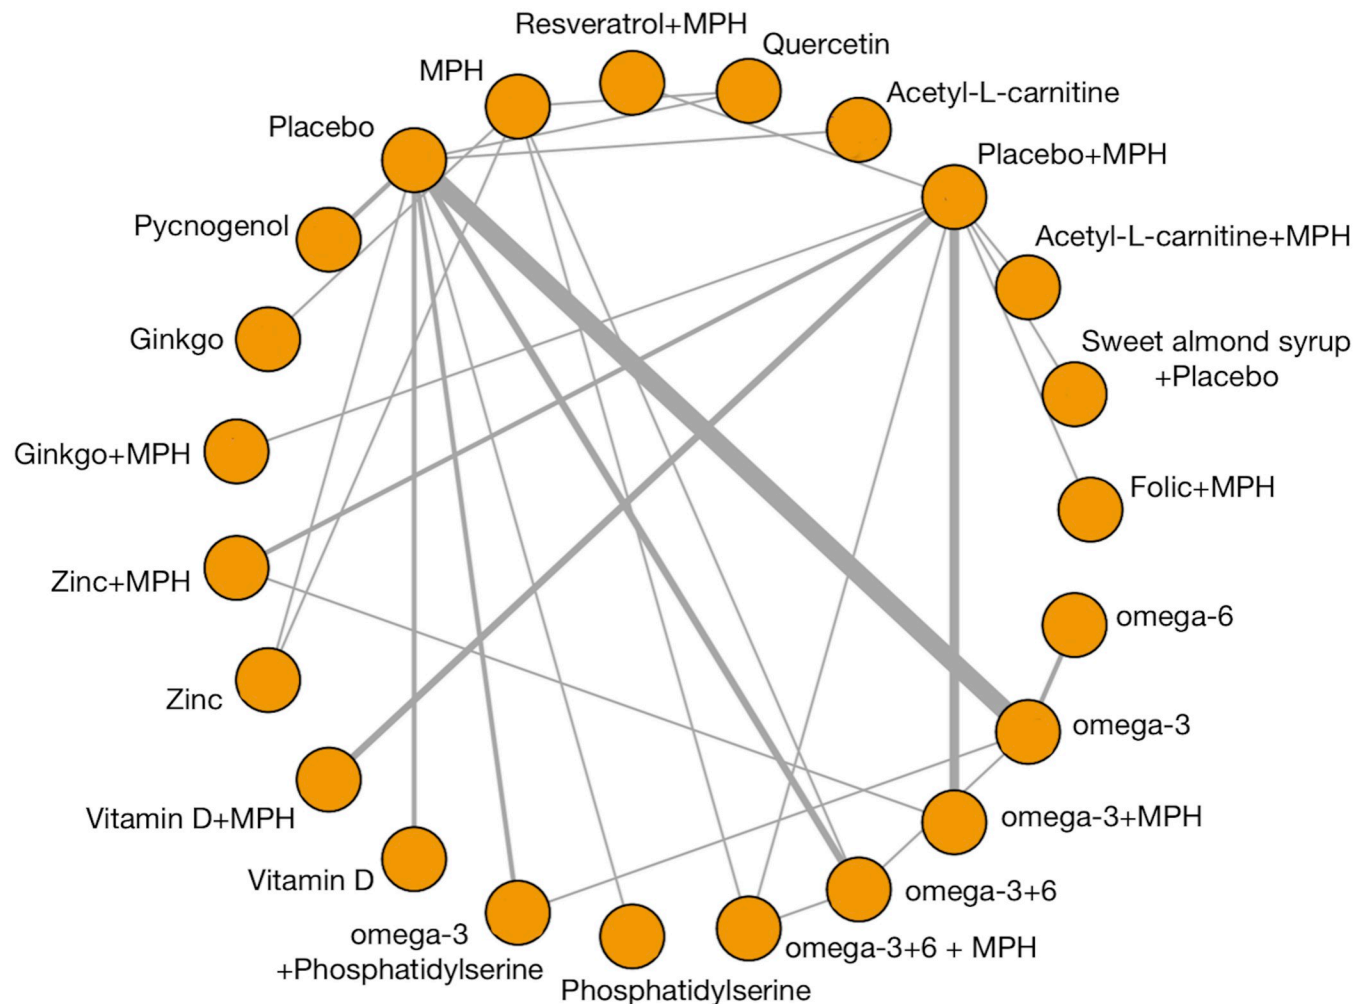

**Fig 2. Evidence network for antioxidant therapy.**

<https://doi.org/10.1371/journal.pone.0296926.g002>

fixed-effects model was selected for analysis. Network meta-analysis (Table 1) on the safety of the included studies showed that omega-6, quercetin, omega-3, Acetyl-L-carnitine, and omega-3+6 were superior to ginkgo and omega-3+6 + MPH; vitamin D+MPH was superior to Zinc+MPH and resveratrol+MPH; sweet almond syrup+placebo and Acetyl-L-carnitine +MPH were superior to resveratrol+MPH, zinc+MPH, and omega-3+MPH; omega-6 was superior to pycnogenol in terms of the safety of antioxidant drugs in children with ADHD (S3A Table).

**Probability ranking.** The ranking of SUCRA values is shown in Table 2. The top three safest antioxidant drugs were omega-6 (0.18), vitamin D (0.19), and quercetin (0.24) (S4A Table).

### Conners' parent rating scale (CPRS)

**Evidence network and consistency test.** The evidence network displayed closed loops within the network relationships (S3B–S3E Fig). To ensure the consistency of the results, nodal analysis was conducted. For the attention score evidence network, there were 5

Table 1. Network meta-analysis for safety of antioxidant therapy.

Table with 30 columns and 40 rows, containing meta-analysis data for various antioxidants. Columns include treatment names (e.g., Placebo, Vitamin D, Omega-3), and values for various outcomes (e.g., GI, Headache, Allergy) with OR and 95% CrI. Significant results are bolded.

Note: significant results are in bold and underscored. OR = Odds ratio, CrI = credibility interval. All results are presented as Lg [OR (95% CrI)].

https://doi.org/10.1371/journal.pone.0299626.t001

**Table 2. Probability ranking for safety of antioxidant therapy.**

| Intervention               | SUCRA | Rank | Intervention               | SUCRA | Rank |
|----------------------------|-------|------|----------------------------|-------|------|
| Folic+MPH                  | 0.70  | 19   | Zinc+MPH                   | 0.88  | 22   |
| Sweet almond syrup+Placebo | 0.31  | 7    | Zinc                       | 0.54  | 13   |
| Acetyl-L-carnitine+MPH     | 0.32  | 6    | Vitamin D+MPH              | 0.62  | 15   |
| Placebo+MPH                | 0.68  | 18   | Vitamin D                  | 0.19  | 2    |
| Acetyl-L-carnitine         | 0.32  | 8    | omega-3+Phosphatidylserine | 0.38  | 11   |
| Quercetin                  | 0.24  | 3    | Phosphatidylserine         | 0.25  | 4    |
| Resveratrol+MPH            | 0.92  | 23   | omega-3+6 + MPH            | 0.65  | 16   |
| MPH                        | 0.46  | 12   | omega-3+6                  | 0.33  | 9    |
| Placebo                    | 0.36  | 10   | omega-3+MPH                | 0.85  | 21   |
| Pycnogenol                 | 0.64  | 17   | omega-3                    | 0.29  | 5    |
| Ginkgo                     | 0.77  | 20   | omega-6                    | 0.18  | 1    |
| Ginkgo+MPH                 | 0.61  | 14   |                            |       |      |

Note: MPH = Methylphenidate; omega-3 = omega-3 fatty acids; omega-6 = omega-6 fatty acids; omega-3 +6 = omega-3 fatty acids+omega-6 fatty acids.

<https://doi.org/10.1371/journal.pone.0296926.t002>

antioxidant drugs involved in 9 studies, encompassing a total of 761 patients. The hyperactivity score evidence network included 5 antioxidant drugs in 9 studies, with a total of 729 patients. Regarding the total score, there were two evidence networks: Network A, which included 5 antioxidant drugs, 12 studies, and 928 patients, and Network B, comprising 4 antioxidant drugs, 5 studies, and 428 patients. Nodal analysis demonstrated that the results from both indirect and direct comparisons were consistent, and no statistically significant differences were observed ( $P \geq 0.05$ ). These findings underscore the high reliability of the results obtained through network meta-analysis (S1B and S1C Fig).

**Heterogeneity test and network meta-analysis.** Heterogeneity testing was performed individually on attention, hyperactivity, and total score, and the results indicated that the heterogeneity among the studies was minimal ( $I^2 < 50\%$ ) across the studies (S2B–S2E Fig). Consequently, the fixed-effects model was employed for the analysis. The network meta-analysis showed no statistically significant differences in efficacy between various interventions (S3B–S3E Table).

**Probability ranking.** The results showed that the top three antioxidant drugs in the improvement of CPRS score were as follows: (i) omega-3 (0.35), phosphatidylserine+omega-3 (0.38), and Acetyl-L-carnitine (0.47) were the most effective for improving attention; (ii) Pycnogenol (0.36), phosphatidylserine+omega-3 (0.42), and omega-3 (0.44) were the most effective for improving hyperactivity; (iii) vitamin D (0.27), phosphatidylserine+omega-3 (0.39), and omega-3+6 (0.53) were the optimal agents for improving total score (network A); (iv) zinc +MPH (0.43), vitamin D+MPH (0.46), and folic+MPH (0.52) were the most effective for improving total score (network B) (S4B–S4E Table).

## Conners' teacher rating scale (CTRS)

**Evidence network.** The evidence network of attention score included 4 antioxidant drugs in 5 studies, with 524 patients. The evidence network of hyperactivity score included 5 antioxidant drugs in 6 studies, with 864 patients. The evidence network of total score included 5 antioxidant drugs in 8 studies, with 930 patients (S3F–S3H Fig).



**Heterogeneity test and network meta-analysis.** Heterogeneity test was carried out on attention, hyperactivity and total score, respectively, and the results showed that the heterogeneity among the studies was small ( $I^2 < 50\%$ ) (S2F and S2G Fig). Therefore, the fixed-effects model was selected for analysis. The network meta-analysis showed no statistical differences in efficacy between interventions (S3F–S3H Table).

**Probability ranking.** The results showed that in terms of CTRS, pycnogenol (0.32), phosphatidylserine+omega-3 (0.47), and omega-3 (0.50) were the top three antioxidant drugs in improving attention; phosphatidylserine+omega-3 (0.26), MPH (0.29), and zinc (0.30) were the most effective in improving hyperactivity; zinc (0.34), MPH (0.36), and omega-3+6 (0.42) were the most effective in improving total score (S4F–S4H Table).

### ADHD Rating Scale-Parent (ADHD RS-Parent)

**Evidence network.** The evidence network of attention score included 11 antioxidant drugs in 21 studies, with 1,342 patients. The evidence network of hyperactivity score included 11 antioxidant drugs in 20 studies, with 1,207 patients. There are two evidence networks of total score: Network A and Network B. Network A included 7 antioxidant drugs in 13 studies, with 887 patients, while network B included 9 antioxidant drugs in 11 studies, with 580 patients (S3I–S3L Fig).

**Heterogeneity test and network meta-analysis.** Heterogeneity test was carried out on attention, hyperactivity and total score, and the results showed no heterogeneity among the studies ( $I^2 < 50\%$ ) (S2H–S2K Fig). Therefore, the fixed-effects model was selected for analysis. The network meta-analysis showed no statistically significant differences in efficacy between interventions (S3I–S3L Table).

**Probability ranking.** The results showed that in terms of ADHD RS-Parent, the top three antioxidant drugs were phosphatidylserine (0.39), vitamin D+MPH (0.40), and vitamin D (0.43) for improving attention, with resveratrol+MPH (0.24), placebo+MPH (0.30), and ginkgo+MPH (0.31) for improving hyperactivity, phosphatidylserine (0.34), vitamin D (0.35), and omega-3 (0.49) for improving total score (network A), and zinc+MPH (0.35), sweet almond syrup+placebo (0.41), and resveratrol+ MPH (0.46) for improving total score (network B) (S4I–S4L Table).

### ADHD Rating Scale-Teacher (ADHD RS-Teacher)

**Evidence network and network meta-analysis.** The evidence network of attention score included 3 antioxidant drugs in 3 studies, with 167 patients. The evidence network of hyperactivity score included 3 antioxidant drugs in 3 studies, with 167 patients. Three evidence networks existed for the total score: Networks A, B, and C. Network A included 3 antioxidant drugs in 3 studies, with 187 patients; network B included 5 antioxidant drugs in 5 studies, with 263 patients; and the evidence network C included 3 antioxidant drugs in 3 studies, with 136 patients (S3M–S3Q Fig). The network meta-analysis of attention, hyperactivity, and overall scores showed no significant differences in efficacy between interventions (S3M–S3Q Table).

**Probability ranking.** Regarding ADHD RS-Teacher, the top three antioxidant drugs were pycnogenol (0.32), vitamin D (0.39), and omega-3 (0.63) for improving attention; vitamin D (0.31), pycnogenol (0.39), and omega-3 (0.62) for improving hyperactivity; vitamin D (0.18), omega-3+6 (0.43), and omega-3 (0.66) for improving total score (network A); zinc+MPH (0.29), resveratrol+MPH (0.45), and Acetyl-L-carnitine+MPH (0.47) in terms of total score (network B); MPH(0.38), zinc (0.44), quercetin (0.46) for improving total score (network C) (S4M–S4Q Table).

### Clinical global impressions scale (CGI)

**Evidence network and network meta-analysis.** The evidence network of CGI included 4 antioxidant drugs in 4 studies, with 331 patients (S3R Fig). The network meta-analysis showed no statistical differences in efficacy between interventions (S3R Table).

**Probability ranking.** In terms of CGI score, omega-3+6 (0.95) had the highest response rate (S4R Table).

### Continuous performance test (CPT)

**Evidence network and network meta-analysis.** The evidence network included 4 antioxidant drugs in 4 studies, with 230 patients (S3S Fig). The network meta-analysis showed no statistical differences in efficacy between interventions (S3S Table).

**Probability ranking.** In the CPT test, the most effective antioxidant drug for improving attention was omega-3+6 (0.42) (S4S Table).

### Quality evaluation of the included studies

The results of the risk of bias assessment are presented in Fig 3. Among the 48 included studies, 29 studies provided specific methods for random allocation [31–34, 36–39, 41, 45–63, 78], and were therefore rated as having a low risk of bias in random allocation. Most of these studies employed computer random sequence allocation. The remaining 19 studies only mentioned random allocation without specific method descriptions and were rated as having an

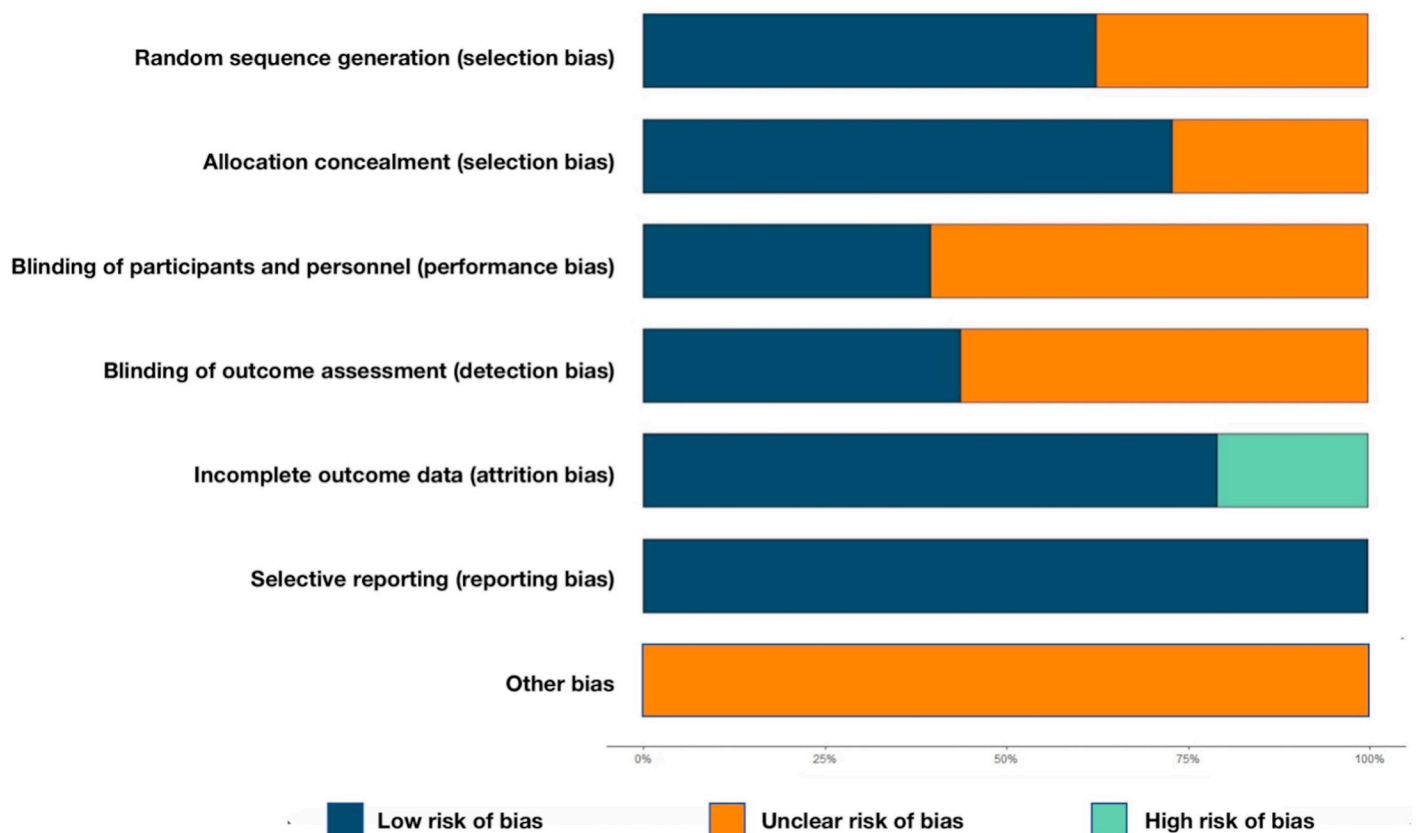

**Fig 3. Quality evaluation of included studies.**

<https://doi.org/10.1371/journal.pone.0296926.g003>

unclear risk [35, 40, 42–44, 64–77]. Notably, none of the studies reported allocation concealment. Nineteen studies reported blinding of intervention for both subjects and medical staff, and they were rated as having a low risk of bias [31–33, 37, 39, 41, 50–54, 56–58, 62, 74, 76–78]. Twenty studies indicated blinding of outcome evaluators, and they were also rated as low-risk [31–34, 37–39, 41, 50–53, 55–57, 62, 74, 76–78]. The data in most studies were relatively complete. However, ten studies only reported the loss to follow-up without explaining the exact reasons for the losses [31, 32, 40, 46, 53, 54, 58, 65, 68, 72], and as a result, they were rated as having a high risk of bias in this regard. No selective reporting bias was identified, and all studies were rated as low-risk. The existence of other sources of bias remained unknown, as detailed in [S5 Table](#).

## Discussion

The network meta-analysis of the 48 included studies revealed that seven antioxidant drugs ranked higher in terms of safety when compared to placebo and MPH. Furthermore, the best antioxidant drug in each rating scale demonstrated superior efficacy compared to placebo, and these results are clearly reflected in the probability rankings. There was no similar systematic review before. In pediatric clinical practice, drug treatment should be individualized based on specific symptoms in children with ADHD. The results of this systematic review are of great clinical and social significance, providing a reference for patients suffering from ADHD to select optimal drugs worldwide [79]. Most children with ADHD are found in families with low social status or low income [80]. However, central stimulants and behavioral training are costly, and the economic pressures may result in discontinuation of interventions, leading to rebound behavior problems. Parents may also neglect their child's physical and mental health, and their children in the long run may develop mood disorders, language disorders, social disorders, resulting in a poor prognosis [81, 82]. Evidence shows that oxidative stress may be a major pathophysiological factor for ADHD [83]. Persistent psychological problems increase ROS levels, enhance oxidative stress and decrease brain antioxidant capacity, contributing largely to neurological damage [84] and a series of functional disorders [85]. Therefore, seeking safer, more economical, and more effective antioxidant drugs is urgently needed. Various antioxidant drugs with inconsistent mechanisms and mutual interaction play an antioxidant role in vivo through different pathways.

## Regulate intercellular signal transduction

Based on the NMA results, unsaturated fatty acid is the best option for the improvement of CPRS, CGI, and CPT. Unsaturated fatty acids interact with membrane phospholipids to form structural modifiers, which increase membrane flow and permeability [86], help regulate NRF1/HMOX1 signaling pathway [87], reduce oxidative stress in vivo, and relieve anxiety symptoms [88]. Similarly, resveratrol easily crosses the blood-brain barrier due to its lipophilic structure, participates in astrocyte proliferation and activation, maintains T-lymphocyte mediated adaptive immunity, and exhibits the anti-inflammation effect, and reduces stimulation of the central nervous system [89]. This may be the reason why it ranks high in improving ADHD RS-Parent's hyperactivity score, and long-term use may also reduce cognitive impairment [90]. These two drugs modulate the phenotype and function of M1 and M2 macrophages, indirectly enhancing the antioxidant barrier [91]. In addition, pycnogenol and ginkgo biloba both inhibit NF- $\kappa$ B signaling [92, 93], thereby reducing ROS-mediated neuroinflammatory responses and preventing the exacerbation of behavioral problems [94].

### Regulate the expression level of genes or proteins

Our results showed that pycnogenol and zinc were the best options for ADHD patients in terms of CPRS, CTRS, and ADHD RS-Teacher. Aydin et al. found that the level of 8-hydroxy-2'-deoxyguanosine, which is the main marker of damage of purine, decreased *in vivo* after pycnogenol supplement [95], indicating that it is helpful to repair oxidative damage. Kim et al. also found that pycnogenol can repair hydroxyl radical-induced DNA breaks, reducing cell death and brain dysfunction [96]. Zinc can reduce the activation of NF- $\kappa$ B and its target gene, and increase the gene expression of A20 and PPAR- $\alpha$  [97], delay the oxidation process and maintain the working memory ability [98]. In addition, activated vitamin D can promote the expression of Klotho gene [99], regulate the formation of related cellular signaling systems by antioxidants [100], block the uptake of active oxygen by brain neurons, and reduce neurotoxic reactions [101]. All this may explain the reason why these drugs are effective in improving ADHD assessed by ADHD RS-Teacher and CPRS.

### Regulate the activity of enzymes

Antioxidant drugs can regulate enzyme activity directly or indirectly to maintain oxidation-antioxidant balance. Our results showed that phosphatidylserine was the most effective drug to improve the attention of ADHD RS-Parent. Exogenous phosphatidylserine supplementation can enhance the activity of superoxide dismutase in the brain and directly participate in reducing the reaction of oxidative stress products [102]. Besides, it can also play this role when combined with unsaturated fatty acids [103]. Unsaturated fatty acids are indirectly involved in the metabolism of 5-hydroxytryptamine (5-HT) by regulating enzyme activity [104], inhibiting impulsive or self-destructive behavior [105]. In addition, vitamin D can promote the production of tyrosine hydroxylase and increase the concentration of dopamine in synaptic space [106], reduce the excitability of brain neurons [107], and improve patients' self-control ability. Almonds can also indirectly maintain acetylcholine concentrations in synaptic spaces by regulating cholinesterase activity [108], improving executive function.

### Regulate mitochondrial function

Mitochondria with stable structure and function play a pivotal role in antioxidant effect [109]. Overproduction of ROS can damage mitochondrial integrity, and activated vitamin D interacts with vitamin D receptors to counter such damage and stabilize metabolism in brain nerve cells [110]. Vanani and Wang showed that quercetin could reverse the oxidative stress process in hypertensive mice, alleviate the ultrastructural damage of mitochondria, and maintain normal learning or working cycles [111, 112]. Resveratrol can increase the number of mitochondria in mammalian cells by triggering Mitochondrial Biogenesis, improve the energy metabolism of the brain, and assist in antioxidation [113].

### Regulate neurotrophic factors

Animal experiments have shown that acetyl-L-carnitine and folic acid can regulate the levels of neurotrophic factors, such as enhancing the expression of BDNF in the prefrontal cortex and hippocampus, promoting protein synthesis and nourishing neurons, and exerting antidepressant effects through trophic nerves [114, 115]. Zinc can also help people with mood disorders in a similar way [116].

In terms of safety, unsaturated fatty acids were found to have the lowest incidence of adverse reactions among the 12 drugs. It is highly accepted, which may be related to parental preference or family diet [117]. We also summarized the adverse reactions reported in various

studies (S6 and S7 Tables). It should be noted that we classified some special adverse reactions as Others. For example, some studies used multiple evaluation systems and reported even the side effects unrelated to drugs. There are also some drug-specific adverse reactions. For example, Zn has a bad taste, which is inevitable.

A total of 1,194 adverse reactions were reported in the included studies. Decreased appetite had the highest incidence (18.93%), with 198 cases reported in studies related to MPH use. Only 7 cases were reported during the use of herbal medicines, 6 of which were caused by drugs combined with MPH. The association between MPH and gastrointestinal symptoms has been demonstrated [118], so herbal antioxidants alone may be safer than in combination with central stimulants in terms of appetite loss. Headache was reported in 167 cases (13.99%), but it was not found in patients treated with Vitamin D, Folic, Zinc, Pycnogenol and almond. It is noteworthy that the side effects of anxiety/nervousness (12.06%) were reported in 65 cases on MPH alone, and in 23 cases on MPH+placebo. A clinical study has confirmed that MPH can cause similar adverse reactions [25]. A total of 136 cases (11.39%) of abdominal pain were reported, 73 of which were associated with MPH use. The antioxidant ALC was the most frequently reported. Insomnia was reported in 112 cases (9.38%) and drowsiness in 34 cases. The above results are only based on our simple statistical analysis of the side effects in the included studies and need to be carefully interpreted (S6 and S7 Tables).

According to DSM-5 guidelines, the combination of antioxidant drugs and non-pharmacological intervention is also worthy of attention [28]. Several non-pharmacological studies provide considerable evidence to support the treatment of ADHD with CBT, mindfulness, and neurofeedback [119]. CBT can effectively improve behavioral problems and cognitive abilities in ADHD patients [118] and ADHD children with emotional problems [120]. Mindfulness is more suitable for patients with attention deficit or hyperactivity disorder [121]. These treatments are based on traditional or emerging psychological theories, such as cognitive behavioral theory and the human birth theory [16]. They believe that neurodevelopmental disorders may be related to poor parenting patterns in early growth and development. Discordant parent-child relationships cannot foster positive psychology and family well-being, and have long-term impacts on academic, social, and emotional functioning in children with ADHD [122]. In fact, tense family relationships can seriously damage their mental and physical health, such as growth, metabolism, and oxidative stress [123]. Antioxidant therapy, supplemented by psychotherapy, can reduce oxidative stress levels, improve self-regulation, and alleviate emotional problems. A previous study has pointed out that antioxidant drugs are effective as adjuvant therapy for nervous system diseases [124]. However, there are few clinical studies on antioxidants combined with psychological intervention in the treatment of children and adolescents with ADHD. More clinical evidence is urgently needed to verify this finding.

### Limitations and shortcomings

There are several limitations in this study. First, the implementation of randomization and allocation concealment was not described in some studies. Second, variability in the number of studies included for different interventions may introduce uncertainties into the results, potentially affecting the robustness of the findings. Third, the diversity in drug therapy regimens across different studies, as well as the absence of direct comparisons between certain intervention measures, can make it challenging to draw clear conclusions. Fourth, the substantial variation in the duration of different studies may influence the results. Fifth, the safety analysis of the included studies primarily focused on the incidence of adverse events. Due to these limitations, the ranking results should be interpreted with caution. More high-quality, large-sample, multicenter double-blind randomized controlled trials are required for further verification.

## Future directions and conclusion

It is worth noting that a single pathogenesis theory may limit the treatment of ADHD [13]. The occurrence and manifestations of ADHD are complex and multidimensional, and the ADHD symptoms cannot be explained from a single aspect [125]. This suggests that other etiological theories may provide novel insights into the treatment of ADHD. For example, antioxidants can be added to existing treatment modalities. Antioxidant therapy combined with psychotherapy may also be a useful treatment strategy, and no evidence of psychotherapy causing severe non-response has been found in clinical practice [126]. Hence, it may be a new treatment option for ADHD or other neurological disorders in their early stages, although the relationship between ADHD and oxidative stress in children is still understudied.

In conclusion, through the application of network meta-analysis, this study conducted a pioneering comparison of the safety and efficacy of various antioxidant drugs. The findings revealed distinct rankings for safety and efficacy among the 12 antioxidant drugs examined. Consequently, this study offers valuable high-level, evidence-based medical insights for the selection of antioxidant drugs for children with ADHD. In pediatric clinical practice, these findings can inform individualized treatment decisions. However, due to the low methodological quality of the included studies, the probability ranking cannot fully explain the clinical efficacy, and the results should be interpreted cautiously. More high-quality studies are still needed to verify our findings.

## Supporting information

**S1 Checklist. PRISMA NMA checklist for the present systematic review.**  
(DOCX)

**S1 Table. Search terms and history.**  
(DOCX)

**S2 Table. Baseline characteristics of included studies.**  
(DOCX)

**S3 Table. Network meta analysis.**  
(DOCX)

**S4 Table. Probability ranking of SUCRA value.**  
(DOCX)

**S5 Table. Risk of bias for included studies.**  
(DOCX)

**S6 Table. Number and severity of side effect event per study.**  
(DOCX)

**S7 Table. Symptom and number of side effect event per study.**  
(DOCX)

**S8 Table. Definition and interpretation of outcome indicators and statistical analysis.**  
(DOCX)

**S1 Fig. Consistency test.**  
(DOCX)

**S2 Fig. Heterogeneity test.**  
(DOCX)

**S3 Fig. Network geometry.**  
(DOCX)

**S1 File. Methods clarifications from the protocol.**  
(DOCX)

## Author Contributions

**Data curation:** Peike Zhou, Xiaohui Yu, Tao Song.

**Formal analysis:** Peike Zhou, Xiaohui Yu, Tao Song.

**Methodology:** Peike Zhou, Xiaohui Yu, Tao Song.

**Writing – original draft:** Peike Zhou, Xiaoli Hou.

**Writing – review & editing:** Peike Zhou, Xiaohui Yu, Tao Song, Xiaoli Hou.

## References

1. Drechsler R, Brem S, Brandeis D, Grünblatt E, Berger G, Walitza S. ADHD: Current Concepts and Treatments in Children and Adolescents. *Neuropediatrics*. 2020; 51(5):315–335. <https://doi.org/10.1055/s-0040-1701658> PMID: 32559806
2. DeLisi M, Drury AJ, Elbert MJ. The etiology of antisocial personality disorder: The differential roles of adverse childhood experiences and childhood psychopathology. *Compr Psychiatry*. 2019; 92:1–6. <https://doi.org/10.1016/j.comppsy.2019.04.001> PMID: 31079021
3. Nejati V, Derakhshan Z. The effect of physical activity with and without cognitive demand on the improvement of executive functions and behavioral symptoms in children with ADHD. *Expert Rev Neurother*. 2021; 21(5):607–614. <https://doi.org/10.1080/14737175.2021.1912600> PMID: 33849353
4. Palladino VS, McNeill R, Reif A, Kittel-Schneider S. Genetic risk factors and gene-environment interactions in adult and childhood attention-deficit/hyperactivity disorder. *Psychiatr Genet*. 2019; 29(3):63–78. <https://doi.org/10.1097/YPG.0000000000000220> PMID: 30741787
5. Nigg JT, Karalunas SL, Feczko E, Fair DA. Toward a Revised Nosology for Attention-Deficit/Hyperactivity Disorder Heterogeneity. *Biol Psychiatry Cogn Neurosci Neuroimaging*. 2020; 5(8):726–737. <https://doi.org/10.1016/j.bpsc.2020.02.005> PMID: 32305325
6. Faraone SV. The pharmacology of amphetamine and methylphenidate: Relevance to the neurobiology of attention-deficit/hyperactivity disorder and other psychiatric comorbidities. *Neurosci Biobehav Rev*. 2018; 87:255–270. <https://doi.org/10.1016/j.neubiorev.2018.02.001> PMID: 29428394
7. Kian N, Samieefar N, Rezaei N. Prenatal risk factors and genetic causes of ADHD in children. *World J Pediatr*. 2022; 18(5):308–319. <https://doi.org/10.1007/s12519-022-00524-6> PMID: 35235183
8. Hansen JB, Bilenberg N, Timmermann CAG, Jensen RC, Frederiksen H, Andersson AM, et al. Prenatal exposure to bisphenol A and autistic- and ADHD-related symptoms in children aged 2 and 5 years from the Odense Child Cohort. *Environ Health*. 2021; 20(1):24. <https://doi.org/10.1186/s12940-021-00709-y> PMID: 33712018
9. Posner J, Polanczyk GV, Sonuga-Barke E. Attention-deficit hyperactivity disorder. *Lancet*. 2020; 395(10222):450–462. [https://doi.org/10.1016/S0140-6736\(19\)33004-1](https://doi.org/10.1016/S0140-6736(19)33004-1) PMID: 31982036
10. Keyes KM, Davey Smith G, Susser E. Associations of prenatal maternal smoking with offspring hyperactivity: causal or confounded? *Psychol Med*. 2014; 44(4):857–867. <https://doi.org/10.1017/S0033291713000986> PMID: 23676207
11. Yolton K, Cornelius M, Ornoy A, McGough J, Makris S, Schantz S. Exposure to neurotoxicants and the development of attention deficit hyperactivity disorder and its related behaviors in childhood. *Neurotoxicol Teratol*. 2014; 44:30–45. <https://doi.org/10.1016/j.ntt.2014.05.003> PMID: 24846602
12. Lu Z, Pu C, Zhang Y, Sun Y, Liao Y, Kang Z, et al. Oxidative Stress and Psychiatric Disorders: Evidence from the Bidirectional Mendelian Randomization Study. *Antioxidants (Basel)*. 2022; 11(7). <https://doi.org/10.3390/antiox11071386> PMID: 35883877
13. Champ RE, Adamou M, Tolchard B. The impact of psychological theory on the treatment of Attention Deficit Hyperactivity Disorder (ADHD) in adults: A scoping review. *PLoS One*. 2021; 16(12):e0261247. <https://doi.org/10.1371/journal.pone.0261247> PMID: 34932573

14. Xia W, Shen L, Zhang J. Comorbid anxiety and depression in school-aged children with attention deficit hyperactivity disorder (ADHD) and self-reported symptoms of ADHD, anxiety, and depression among parents of school-aged children with and without ADHD. *Shanghai Arch Psychiatry*. 2015; 27(6):356–367. <https://doi.org/10.11919/j.issn.1002-0829.215115> PMID: 27199527
15. Storebø OJ, Rasmussen PD, Simonsen E. Association Between Insecure Attachment and ADHD: Environmental Mediating Factors. *J Atten Disord*. 2016; 20(2):187–196. <https://doi.org/10.1177/1087054713501079> PMID: 24062279
16. Maccari S, Polese D, Reynaert ML, Amici T, Morley-Fletcher S, Fagioli F. Early-life experiences and the development of adult diseases with a focus on mental illness: The Human Birth Theory. *Neuroscience*. 2017; 342:232–251. <https://doi.org/10.1016/j.neuroscience.2016.05.042> PMID: 27235745
17. Hassan W, Silva CE, Mohammadzai IU, da Rocha JB, J LF. Association of oxidative stress to the genesis of anxiety: implications for possible therapeutic interventions. *Curr Neuropharmacol*. 2014; 12(2):120–139. <https://doi.org/10.2174/1570159X11666131120232135> PMID: 24669207
18. Smaga I, Niedzielska E, Gawlik M, Moniczewski A, Krzek J, Przegaliński E, et al. Oxidative stress as an etiological factor and a potential treatment target of psychiatric disorders. Part 2. Depression, anxiety, schizophrenia and autism. *Pharmacol Rep*. 2015; 67(3):569–580. <https://doi.org/10.1016/j.pharep.2014.12.015> PMID: 25933971
19. Cai Y, Xing L, Yang T, Chai R, Wang J, Bao J, et al. The neurodevelopmental role of dopaminergic signaling in neurological disorders. *Neurosci Lett*. 2021; 741:135540. <https://doi.org/10.1016/j.neulet.2020.135540> PMID: 33278505
20. Sankhwar ML, Yadav RS, Shukla RK, Singh D, Ansari RW, Pant AB, et al. Monocrotophos induced oxidative stress and alterations in brain dopamine and serotonin receptors in young rats. *Toxicol Ind Health*. 2016; 32(3):422–436. <https://doi.org/10.1177/0748233713500834> PMID: 24105069
21. Çubukçu HC, Yurtdaş M, Durak ZE, Aytaç B, Güneş HN, Çokal BG, et al. Oxidative and nitrosative stress in serum of patients with Parkinson's disease. *Neurol Sci*. 2016; 37(11):1793–1798. <https://doi.org/10.1007/s10072-016-2663-1> PMID: 27423450
22. Tabeshpour J, Mehri S, Abnous K, Hosseinzadeh H. Neuroprotective Effects of Thymoquinone in Acrylamide-Induced Peripheral Nervous System Toxicity Through MAPKinase and Apoptosis Pathways in Rat. *Neurochem Res*. 2019; 44(5):1101–1112. <https://doi.org/10.1007/s11064-019-02741-4> PMID: 30725239
23. Albajara Sáenz A, Villemonteix T, Massat I. Structural and functional neuroimaging in attention-deficit/hyperactivity disorder. *Dev Med Child Neurol*. 2019; 61(4):399–405. <https://doi.org/10.1111/dmcn.14050> PMID: 30276811
24. Zaami S, Tagliabracci A, Berretta P, Busardò FP, Marinelli E. Use of Methylphenidate Analogues as Cognitive Enhancers: The Prelude to Cosmetic Neurology and an Ethical Issue. *Front Psychiatry*. 2019; 10:1006. <https://doi.org/10.3389/fpsy.2019.01006> PMID: 32038333
25. Krinzinger H, Hall CL, Groom MJ, Ansari MT, Banaschewski T, Buitelaar JK, et al. Neurological and psychiatric adverse effects of long-term methylphenidate treatment in ADHD: A map of the current evidence. *Neurosci Biobehav Rev*. 2019; 107:945–968. <https://doi.org/10.1016/j.neubiorev.2019.09.023> PMID: 31545988
26. Hutton B, Salanti G, Caldwell DM, Chaimani A, Schmid CH, Cameron C, et al. The PRISMA extension statement for reporting of systematic reviews incorporating network meta-analyses of health care interventions: checklist and explanations. *Ann Intern Med*. 2015; 162(11):777–784. <https://doi.org/10.7326/M14-2385> PMID: 26030634
27. Higgins JPT, Thomas J, Chandler J, Cumpston M, Li T, Page MJ, et al. *Cochrane handbook for systematic reviews of interventions*. 2nd ed. Chichester (UK): John Wiley & Sons; 2019.
28. American Psychiatric Association. *Diagnostic and statistical manual of mental disorders*. 5th ed. Washington DC: American psychiatric association; 2013.
29. Sibley MH, Bruton AM, Zhao X, Johnstone JM, Mitchell J, Hatsu I, et al. Non-pharmacological interventions for attention-deficit hyperactivity disorder in children and adolescents. *Lancet Child Adolesc Health*. 2023; 7(6):415–428. [https://doi.org/10.1016/S2352-4642\(22\)00381-9](https://doi.org/10.1016/S2352-4642(22)00381-9) PMID: 36907194
30. Salanti G, Ades AE, Ioannidis JP. Graphical methods and numerical summaries for presenting results from multiple-treatment meta-analysis: an overview and tutorial. *J Clin Epidemiol*. 2011; 64(2):163–171. <https://doi.org/10.1016/j.jclinepi.2010.03.016> PMID: 20688472
31. Rafeiy-Torghabeh M, Ashraf-Ganjouei A, Moradi K, Bagheri S, Mohammadi MR, Akhondzadeh S. Resveratrol adjunct to methylphenidate improves symptoms of attention-deficit/hyperactivity disorder: a randomized, double-blinded, placebo-controlled clinical trial. *Eur Child Adolesc Psychiatry*. 2021; 30(5):799–807. <https://doi.org/10.1007/s00787-020-01562-z> PMID: 32449130
32. Motaharifard MS, Effatpanah M, Karimi M, Akhondzadeh S, Rahimi H, Yasrebi SA, et al. Effect of sweet almond syrup versus methylphenidate in children with ADHD: A randomized triple-blind clinical



- trial. *Complement Ther Clin Pract*. 2019; 36:170–175. <https://doi.org/10.1016/j.ctcp.2019.07.008> PMID: 31383435
33. Akhondzadeh S, Mohammadi M, Momeni F. *Passiflora incarnata* in the treatment of attention-deficit hyperactivity disorder in children and adolescents. *Clinical Practice*. 2005; 2(4):609–614. <https://doi.org/10.2217/14750708.2.4.609>
  34. Weber W, Vander Stoep A, McCarty RL, Weiss NS, Biederman J, McClellan J. *Hypericum perforatum* (St John's wort) for attention-deficit/hyperactivity disorder in children and adolescents: a randomized controlled trial. *Jama*. 2008; 299(22):2633–2641. <https://doi.org/10.1001/jama.299.22.2633> PMID: 18544723
  35. Ghanizadeh A, Sayyari Z, Mohammadi MR. Effect of methylphenidate and folic Acid on ADHD symptoms and quality of life and aggression: a randomized double blind placebo controlled clinical trial. *Iran J Psychiatry*. 2013; 8(3):108–112. PMID: 24454418
  36. Riahi F, Tashakori A, Vanani GS. Effects of Folic Acid on Appetite in Children with Attention Deficit Hyperactivity Disorder (ADHD) Treated with Methylphenidate: A Randomized Double-Blind Clinical Trial. *Iran J Med Sci*. 2018; 43(1):9–17. <https://doi.org/10.1177/1087054714533191> PMID: 29398747
  37. Salehi B, Imani R, Mohammadi MR, Fallah J, Mohammadi M, Ghanizadeh A, et al. *Ginkgo biloba* for attention-deficit/hyperactivity disorder in children and adolescents: a double blind, randomized controlled trial. *Prog Neuropsychopharmacol Biol Psychiatry*. 2010; 34(1):76–80. <https://doi.org/10.1016/j.pnpbp.2009.09.026> PMID: 19815048
  38. Shakibaei F, Radmanesh M, Salari E, Mahaki B. *Ginkgo biloba* in the treatment of attention-deficit/hyperactivity disorder in children and adolescents. A randomized, placebo-controlled, trial. *Complement Ther Clin Pract*. 2015; 21(2):61–67. <https://doi.org/10.1016/j.ctcp.2015.04.001> PMID: 25925875
  39. Abbasi SH, Heidari S, Mohammadi MR, Tabrizi M, Ghaleiha A, Akhondzadeh S. *Acetyl-L-carnitine* as an adjunctive therapy in the treatment of attention-deficit/hyperactivity disorder in children and adolescents: a placebo-controlled trial. *Child Psychiatry Hum Dev*. 2011; 42(3):367–375. <https://doi.org/10.1007/s10578-011-0220-y> PMID: 21336630
  40. Arnold LE, Amato A, Bozzolo H, Hollway J, Cook A, Ramadan Y, et al. *Acetyl-L-carnitine (ALC)* in attention-deficit/hyperactivity disorder: a multi-site, placebo-controlled pilot trial. *J Child Adolesc Psychopharmacol*. 2007; 17(6):791–802. <https://doi.org/10.1089/cap.2007.018> PMID: 18315451
  41. Akhondzadeh S, Mohammadi MR, Khademi M. *Zinc sulfate* as an adjunct to methylphenidate for the treatment of attention deficit hyperactivity disorder in children: a double blind and randomized trial [ISRCTN64132371]. *BMC Psychiatry*. 2004; 4:9. <https://doi.org/10.1186/1471-244X-4-9> PMID: 15070418
  42. Arnold LE, Disilvestro RA, Bozzolo D, Bozzolo H, Crowl L, Fernandez S, et al. *Zinc* for attention-deficit/hyperactivity disorder: placebo-controlled double-blind pilot trial alone and combined with amphetamine. *J Child Adolesc Psychopharmacol*. 2011; 21(1):1–19. <https://doi.org/10.1089/cap.2010.0073> PMID: 21309695
  43. Bilici M, Yildirim F, Kandil S, Bekaroğlu M, Yildirmiş S, Değer O, et al. Double-blind, placebo-controlled study of *zinc sulfate* in the treatment of attention deficit hyperactivity disorder. *Prog Neuropsychopharmacol Biol Psychiatry*. 2004; 28(1):181–190. <https://doi.org/10.1016/j.pnpbp.2003.09.034> PMID: 14687872
  44. Noorazar SG, Malek A, Aghaei SM, Yasamineh N, Kalejahi P. The efficacy of *zinc* augmentation in children with attention deficit hyperactivity disorder under treatment with methylphenidate: A randomized controlled trial. *Asian J Psychiatr*. 2020; 48:101868. <https://doi.org/10.1016/j.ajp.2019.101868> PMID: 31841818
  45. Hsu CD, Hsieh LH, Chen YL, Lin IC, Chen YR, Chen CC, et al. Complementary effects of pine bark extract supplementation on inattention, impulsivity, and antioxidative status in children with attention-deficit hyperactivity disorder: A double-blinded randomized placebo-controlled cross-over study. *Phytother Res*. 2021; 35(6):3226–3235. <https://doi.org/10.1002/ptr.7036> PMID: 33559134
  46. Trebatická J, Kopasová S, Hradecná Z, Cinovský K, Skodáček I, Suba J, et al. Treatment of ADHD with French maritime pine bark extract, *Pycnogenol*. *Eur Child Adolesc Psychiatry*. 2006; 15(6):329–335. <https://doi.org/10.1007/s00787-006-0538-3> PMID: 16699814
  47. Manor I, Magen A, Keidar D, Rosen S, Tasker H, Cohen T, et al. The effect of phosphatidylserine containing Omega3 fatty-acids on attention-deficit hyperactivity disorder symptoms in children: a double-blind placebo-controlled trial, followed by an open-label extension. *Eur Psychiatry*. 2012; 27(5):335–342. <https://doi.org/10.1016/j.eurpsy.2011.05.004> PMID: 21807480
  48. Vaisman N, Kaysar N, Zaruk-Adasha Y, Pelled D, Brichon G, Zwingelstein G, et al. Correlation between changes in blood fatty acid composition and visual sustained attention performance in children with inattention: effect of dietary n-3 fatty acids containing phospholipids. *Am J Clin Nutr*. 2008; 87(5):1170–1180. <https://doi.org/10.1093/ajcn/87.5.1170> PMID: 18469236

49. Mohammadpour N, Jazayeri S, Tehrani-Doost M, Djalali M, Hosseini M, Effatpanah M, et al. Effect of vitamin D supplementation as adjunctive therapy to methylphenidate on ADHD symptoms: A randomized, double blind, placebo-controlled trial. *Nutr Neurosci*. 2018; 21(3):202–209. <https://doi.org/10.1080/1028415X.2016.1262097> PMID: 27924679
50. Hemamy M, Heidari-Beni M, Askari G, Karahmadi M, Maracy M. Effect of Vitamin D and Magnesium Supplementation on Behavior Problems in Children with Attention-Deficit Hyperactivity Disorder. *Int J Prev Med*. 2020; 11:4. [https://doi.org/10.4103/ijpvm.IJPVM\\_546\\_17](https://doi.org/10.4103/ijpvm.IJPVM_546_17) PMID: 32089804
51. Assareh M, Davari Ashtiani R, Khademi M, Jazayeri S, Rai A, Nikoo M. Efficacy of Polyunsaturated Fatty Acids (PUFA) in the Treatment of Attention Deficit Hyperactivity Disorder. *J Atten Disord*. 2017; 21(1):78–85. <https://doi.org/10.1177/1087054712463962> PMID: 23160488
52. Carucci S, Romaniello R, Demuru G, Curatolo P, Grelloni C, Masi G, et al. Omega-3/6 supplementation for mild to moderate inattentive ADHD: a randomised, double-blind, placebo-controlled efficacy study in Italian children. *Eur Arch Psychiatry Clin Neurosci*. 2022; 272(8):1453–1467. <https://doi.org/10.1007/s00406-022-01428-2> PMID: 35672606
53. Döpfner M, Dose C, Breuer D, Heintz S, Schifffhauer S, Banaschewski T. Efficacy of Omega-3/Omega-6 Fatty Acids in Preschool Children at Risk of ADHD: A Randomized Placebo-Controlled Trial. *J Atten Disord*. 2021; 25(8):1096–1106. <https://doi.org/10.1177/1087054719883023> PMID: 31680604
54. Cornu C, Mercier C, Ginhoux T, Masson S, Mouchet J, Nony P, et al. A double-blind placebo-controlled randomised trial of omega-3 supplementation in children with moderate ADHD symptoms. *Eur Child Adolesc Psychiatry*. 2018; 27(3):377–384. <https://doi.org/10.1007/s00787-017-1058-z> PMID: 28993963
55. Behdani F, Hebrani P, Naseraee A, Haghighi MB, Akhavanrezayat A. Does omega-3 supplement enhance the therapeutic results of methylphenidate in attention deficit hyperactivity disorder patients? *J Res Med Sci*. 2013; 18(8):653–658. PMID: 24379840
56. Chang JP, Su KP, Mondelli V, Satyanarayanan SK, Yang HT, Chiang YJ, et al. High-dose eicosapentaenoic acid (EPA) improves attention and vigilance in children and adolescents with attention deficit hyperactivity disorder (ADHD) and low endogenous EPA levels. *Transl Psychiatry*. 2019; 9(1):303. <https://doi.org/10.1038/s41398-019-0633-0> PMID: 31745072
57. Crippa A, Tesei A, Sangiorgio F, Salandi A, Trabattini S, Grazioli S, et al. Behavioral and cognitive effects of docosahexaenoic acid in drug-naïve children with attention-deficit/hyperactivity disorder: a randomized, placebo-controlled clinical trial. *Eur Child Adolesc Psychiatry*. 2019; 28(4):571–583. <https://doi.org/10.1007/s00787-018-1223-z> PMID: 30246216
58. Kean JD, Sarris J, Scholey A, Silberstein R, Downey LA, Stough C. Reduced inattention and hyperactivity and improved cognition after marine oil extract (PCSO-524<sup>®</sup>) supplementation in children and adolescents with clinical and subclinical symptoms of attention-deficit hyperactivity disorder (ADHD): a randomised, double-blind, placebo-controlled trial. *Psychopharmacology (Berl)*. 2017; 234(3):403–420. <https://doi.org/10.1007/s00213-016-4471-y> PMID: 27921139
59. Hariri M, Djazayeri A, Djalali M, Saedisomeolia A, Rahimi A, Abdollahian E. Effect of n-3 supplementation on hyperactivity, oxidative stress and inflammatory mediators in children with attention-deficit-hyperactivity disorder. *Malays J Nutr*. 2012; 18(3):329–335. PMID: 24568073
60. Moghaddam MF, Shamekhi M, Rakhshani T. Effectiveness of methylphenidate and PUFA for the treatment of patients with ADHD: A double-blinded randomized clinical trial. *Electron Physician*. 2017; 9(5):4412–4418. <https://doi.org/10.19082/4412> PMID: 28713515
61. Mohammadzadeh S, Baghi N, Yousefi F, Yousefzamani B. Effect of omega-3 plus methylphenidate as an alternative therapy to reduce attention deficit-hyperactivity disorder in children. *Korean J Pediatr*. 2019; 62(9):360–366. <https://doi.org/10.3345/kjp.2018.06982> PMID: 31122010
62. Rodríguez C, García T, Areces D, Fernández E, García-Noriega M, Domingo JC. Supplementation with high-content docosahexaenoic acid triglyceride in attention-deficit hyperactivity disorder: a randomized double-blind placebo-controlled trial. *Neuropsychiatr Dis Treat*. 2019; 15:1193–1209. <https://doi.org/10.2147/NDT.S206020> PMID: 31190827
63. Salehi B, Mohammadbeigi A, Sheykholeslam H, Moshiri E, Dorreh F. Omega-3 and Zinc supplementation as complementary therapies in children with attention-deficit/hyperactivity disorder. *J Res Pharm Pract*. 2016; 5(1):22–26. <https://doi.org/10.4103/2279-042X.176561> PMID: 26985432
64. Hirayama S, Terasawa K, Rabeler R, Hirayama T, Inoue T, Tatsumi Y, et al. The effect of phosphatidylserine administration on memory and symptoms of attention-deficit hyperactivity disorder: a randomized, double-blind, placebo-controlled clinical trial. *J Hum Nutr Diet*. 2014; 27 Suppl 2:284–291. <https://doi.org/10.1111/jhn.12090> PMID: 23495677
65. Dehbokri N, Noorazar G, Ghaffari A, Mehdizadeh G, Sarbakhsh P, Ghaffary S. Effect of vitamin D treatment in children with attention-deficit hyperactivity disorder. *World J Pediatr*. 2019; 15(1):78–84. <https://doi.org/10.1007/s12519-018-0209-8> PMID: 30456564

66. Elshorbagy HH, Barseem NF, Abdelghani WE, Suliman HAI, Al-Shokary AH, Abdulsamea SE, et al. Impact of Vitamin D Supplementation on Attention-Deficit Hyperactivity Disorder in Children. *Ann Pharmacother*. 2018; 52(7):623–631. <https://doi.org/10.1177/1060028018759471> PMID: 29457493
67. Naeini AA, Fasihi F, Najafi M, Ghazvini MR, Hasanzadeh A. The effects of vitamin D supplementation on ADHD (Attention Deficit Hyperactivity Disorder) in 6–13 year-old students: A randomized, double-blind, placebo-controlled study. *European Journal of Integrative Medicine*. 2019; 25:28–33. <https://doi.org/10.1016/j.eujim.2018.10.006>
68. Rahmani M, Mahvelati A, Farajinia AH, Shahyad S, Khaksarian M, Nooripour R, et al. Comparison of Vitamin D, Neurofeedback, and Neurofeedback Combined with Vitamin D Supplementation in Children with Attention-Deficit/Hyperactivity Disorder. *Arch Iran Med*. 2022; 25(5):285–393. <https://doi.org/10.34172/aim.2022.47> PMID: 35943003
69. Barragán E, Breuer D, Döpfner M. Efficacy and Safety of Omega-3/6 Fatty Acids, Methylphenidate, and a Combined Treatment in Children With ADHD. *J Atten Disord*. 2017; 21(5):433–441. <https://doi.org/10.1177/1087054713518239> PMID: 24464327
70. Johnson M, Ostlund S, Fransson G, Kadesjö B, Gillberg C. Omega-3/omega-6 fatty acids for attention deficit hyperactivity disorder: a randomized placebo-controlled trial in children and adolescents. *J Atten Disord*. 2009; 12(5):394–401. <https://doi.org/10.1177/1087054708316261> PMID: 18448859
71. Stevens L, Zhang W, Peck L, Kuczek T, Grevstad N, Mahon A, et al. EFA supplementation in children with inattention, hyperactivity, and other disruptive behaviors. *Lipids*. 2003; 38(10):1007–1021. <https://doi.org/10.1007/s11745-006-1155-0> PMID: 14669965
72. Matsudaira T, Gow RV, Kelly J, Murphy C, Potts L, Sumich A, et al. Biochemical and Psychological Effects of Omega-3/6 Supplements in Male Adolescents with Attention-Deficit/Hyperactivity Disorder: A Randomized, Placebo-Controlled, Clinical Trial. *J Child Adolesc Psychopharmacol*. 2015; 25(10):775–782. <https://doi.org/10.1089/cap.2015.0052> PMID: 26682998
73. Bélanger SA, Vanasse M, Spahis S, Sylvestre MP, Lippé S, L'Heureux F, et al. Omega-3 fatty acid treatment of children with attention-deficit hyperactivity disorder: A randomized, double-blind, placebo-controlled study. *Paediatr Child Health*. 2009; 14(2):89–98. <https://doi.org/10.1093/pch/14.2.89> PMID: 19436468
74. Dubnov-Raz G, Khoury Z, Wright I, Raz R, Berger I. The effect of alpha-linolenic acid supplementation on ADHD symptoms in children: a randomized controlled double-blind study. *Front Hum Neurosci*. 2014; 8:780. <https://doi.org/10.3389/fnhum.2014.00780> PMID: 25339885
75. Gustafsson PA, Birberg-Thornberg U, Duchén K, Landgren M, Malmberg K, Pelling H, et al. EPA supplementation improves teacher-rated behaviour and oppositional symptoms in children with ADHD. *Acta Paediatr*. 2010; 99(10):1540–1549. <https://doi.org/10.1111/j.1651-2227.2010.01871.x> PMID: 20491709
76. Milte CM, Parletta N, Buckley JD, Coates AM, Young RM, Howe PR. Eicosapentaenoic and docosahexaenoic acids, cognition, and behavior in children with attention-deficit/hyperactivity disorder: a randomized controlled trial. *Nutrition*. 2012; 28(6):670–677. <https://doi.org/10.1016/j.nut.2011.12.009> PMID: 22541055
77. Raz R, Carasso RL, Yehuda S. The influence of short-chain essential fatty acids on children with attention-deficit/hyperactivity disorder: a double-blind placebo-controlled study. *J Child Adolesc Psychopharmacol*. 2009; 19(2):167–177. <https://doi.org/10.1089/cap.2008.070> PMID: 19364294
78. Widenhorn-Müller K, Schwanda S, Scholz E, Spitzer M, Bode H. Effect of supplementation with long-chain  $\omega$ -3 polyunsaturated fatty acids on behavior and cognition in children with attention deficit/hyperactivity disorder (ADHD): a randomized placebo-controlled intervention trial. *Prostaglandins Leukot Essent Fatty Acids*. 2014; 91(1–2):49–60. <https://doi.org/10.1016/j.plefa.2014.04.004> PMID: 24958525
79. Sayal K, Prasad V, Daley D, Ford T, Coghill D. ADHD in children and young people: prevalence, care pathways, and service provision. *Lancet Psychiatry*. 2018; 5(2):175–186. [https://doi.org/10.1016/S2215-0366\(17\)30167-0](https://doi.org/10.1016/S2215-0366(17)30167-0) PMID: 29033005
80. Spencer NJ, Ludvigsson J, Bai G, Gauvin L, Clifford SA, Abu Awad Y, et al. Social gradients in ADHD by household income and maternal education exposure during early childhood: Findings from birth cohort studies across six countries. *PLoS One*. 2022; 17(3):e0264709. <https://doi.org/10.1371/journal.pone.0264709> PMID: 35294456
81. Mohammadi MR, Zarafshan H, Khaleghi A, Ahmadi N, Hooshyari Z, Mostafavi SA, et al. Prevalence of ADHD and Its Comorbidities in a Population-Based Sample. *J Atten Disord*. 2021; 25(8):1058–1067. <https://doi.org/10.1177/1087054719886372> PMID: 31833803
82. Leffa DT, Caye A, Rohde LA. ADHD in Children and Adults: Diagnosis and Prognosis. *Curr Top Behav Neurosci*. 2022; 57:1–18. [https://doi.org/10.1007/7854\\_2022\\_329](https://doi.org/10.1007/7854_2022_329) PMID: 35397064
83. Verlaet AAJ, Breynaert A, Ceulemans B, De Bruyne T, Franssen E, Pieters L, et al. Oxidative stress and immune aberrancies in attention-deficit/hyperactivity disorder (ADHD): a case-control

- comparison. *Eur Child Adolesc Psychiatry*. 2019; 28(5):719–729. <https://doi.org/10.1007/s00787-018-1239-4> PMID: 30350094
84. Bhatt S, Nagappa AN, Patil CR. Role of oxidative stress in depression. *Drug Discov Today*. 2020; 25(7):1270–1276. <https://doi.org/10.1016/j.drudis.2020.05.001> PMID: 32404275
  85. Pantic I, Cumic J, Skodric SR, Dugalic S, Brodski C. Oxidopamine and oxidative stress: Recent advances in experimental physiology and pharmacology. *Chem Biol Interact*. 2021; 336:109380. <https://doi.org/10.1016/j.cbi.2021.109380> PMID: 33450287
  86. Pedroni VI, Sierra MB, Alarcón LM, Verde AR, Appignanesi GA, Morini MA. A certain proportion of docosahexaenoic acid tends to revert structural and dynamical effects of cholesterol on lipid membranes. *Biochim Biophys Acta Biomembr*. 2021; 1863(6):183584. <https://doi.org/10.1016/j.bbmem.2021.183584> PMID: 33571481
  87. Sun J, Zhang W. Supplementation with dietary omega-3 PUFA mitigates fetal brain inflammation and mitochondrial damage caused by high doses of sodium nitrite in maternal rats. *PLoS One*. 2022; 17(3):e0266084. <https://doi.org/10.1371/journal.pone.0266084> PMID: 35324981
  88. Bozzatello P, De Rosa ML, Rocca P, Bellino S. Effects of Omega 3 Fatty Acids on Main Dimensions of Psychopathology. *Int J Mol Sci*. 2020; 21(17). <https://doi.org/10.3390/ijms21176042> PMID: 32839416
  89. Wu M, Wang L, Li F, Hu R, Ma J, Zhang K, et al. Resveratrol Downregulates STAT3 Expression and Astrocyte Activation in Primary Astrocyte Cultures of Rat. *Neurochem Res*. 2020; 45(2):455–464. <https://doi.org/10.1007/s11064-019-02936-9> PMID: 31853718
  90. Garrigue P, Mounien L, Champion S, Mouhajir Y, Pechere L, Guillet B, et al. Long-term administration of resveratrol at low doses improves neurocognitive performance as well as cerebral blood flow and modulates the inflammatory pathways in the brain. *J Nutr Biochem*. 2021; 97:108786. <https://doi.org/10.1016/j.jnutbio.2021.108786> PMID: 34082127
  91. Schwager J, Bompard A, Raederstorff D, Hug H, Bendik I. Resveratrol and  $\omega$ -3 PUFAs Promote Human Macrophage Differentiation and Function. *Biomedicines*. 2022; 10(7). <https://doi.org/10.3390/biomedicines10071524> PMID: 35884829
  92. Jafari F, Goudarzvand M, Hajikhani R, Qorbani M, Solati J. Pycnogenol ameliorates motor function and gene expressions of NF- $\kappa$ B and Nrf2 in a 6-hydroxydopamine-induced experimental model of Parkinson's disease in male NMRI mice. *Naunyn Schmiedebergs Arch Pharmacol*. 2022; 395(3):305–313. <https://doi.org/10.1007/s00210-022-02201-x> PMID: 35024909
  93. Zhang L, Li G, Tao S, Xia P, Chaudhry N, Kaura S, et al. Ginkgo Biloba Extract Reduces Cardiac and Brain Inflammation in Rats Fed a HFD and Exposed to Chronic Mental Stress through NF- $\kappa$ B Inhibition. *Mediators Inflamm*. 2022; 2022:2408598. <https://doi.org/10.1155/2022/2408598> PMID: 35677735
  94. Kerekes N, Sánchez-Pérez AM, Landry M. Neuroinflammation as a possible link between attention-deficit/hyperactivity disorder (ADHD) and pain. *Med Hypotheses*. 2021; 157:110717. <https://doi.org/10.1016/j.mehy.2021.110717> PMID: 34717072
  95. Aydın S, Bacanlı M, Anlar HG, Çal T, Arı N, Ündeğer Bucurgat Ü, et al. Preventive role of Pycnogenol (®) against the hyperglycemia-induced oxidative stress and DNA damage in diabetic rats. *Food Chem Toxicol*. 2019; 124:54–63. <https://doi.org/10.1016/j.fct.2018.11.038> PMID: 30465898
  96. Kim B, Lee TK, Park CW, Kim DW, Ahn JH, Sim H, et al. Pycnogenol (®) Supplementation Attenuates Memory Deficits and Protects Hippocampal CA1 Pyramidal Neurons via Antioxidative Role in a Gerbil Model of Transient Forebrain Ischemia. *Nutrients*. 2020; 12(8). <https://doi.org/10.3390/nu12082477> PMID: 32824513
  97. Costa MI, Sarmiento-Ribeiro AB, Gonçalves AC. Zinc: From Biological Functions to Therapeutic Potential. *Int J Mol Sci*. 2023; 24(5). <https://doi.org/10.3390/ijms24054822> PMID: 36902254
  98. Kawahara M, Tanaka KI, Kato-Negishi M. Zinc, Carnosine, and Neurodegenerative Diseases. *Nutrients*. 2018; 10(2). <https://doi.org/10.3390/nu10020147> PMID: 29382141
  99. Eltablawy N, Ashour H, Rashed LA, Hamza WM. Vitamin D protection from rat diabetic nephropathy is partly mediated through Klotho expression and renin-angiotensin inhibition. *Arch Physiol Biochem*. 2018; 124(5):461–467. <https://doi.org/10.1080/13813455.2018.1423624> PMID: 29308676
  100. Cui W, Leng B, Wang G. Klotho protein inhibits H(2)O(2)-induced oxidative injury in endothelial cells via regulation of PI3K/AKT/Nrf2/HO-1 pathways. *Can J Physiol Pharmacol*. 2019; 97(5):370–376. <https://doi.org/10.1139/cjpp-2018-0277> PMID: 30576222
  101. Wimalawansa SJ. Vitamin D Deficiency: Effects on Oxidative Stress, Epigenetics, Gene Regulation, and Aging. *Biology (Basel)*. 2019; 8(2). <https://doi.org/10.3390/biology8020030> PMID: 31083546
  102. Che H, Fu X, Zhang L, Gao X, Wen M, Du L, et al. Neuroprotective Effects of n-3 Polyunsaturated Fatty Acid-Enriched Phosphatidylserine Against Oxidative Damage in PC12 Cells. *Cell Mol Neurobiol*. 2018; 38(3):657–668. <https://doi.org/10.1007/s10571-017-0516-y> PMID: 28689275

103. Ren Q, Sun J, Xu D, Xie H, Ye M, Zhao Y. A Dietary Supplement Containing Micronutrients, Phosphatidylserine, and Docosahexaenoic Acid Counteracts Cognitive Impairment in D-Galactose-Induced Aged Rats. *Front Nutr.* 2022; 9:931734. <https://doi.org/10.3389/fnut.2022.931734> PMID: 35866081
104. Liu X, Hao J, Yao E, Cao J, Zheng X, Yao D, et al. Polyunsaturated fatty acid supplement alleviates depression-incident cognitive dysfunction by protecting the cerebrovascular and glymphatic systems. *Brain Behav Immun.* 2020; 89:357–370. <https://doi.org/10.1016/j.bbi.2020.07.022> PMID: 32717402
105. Gorinski N, Bijata M, Prasad S, Wirth A, Abdel Galil D, Zeug A, et al. Attenuated palmitoylation of serotonin receptor 5-HT1A affects receptor function and contributes to depression-like behaviors. *Nat Commun.* 2019; 10(1):3924. <https://doi.org/10.1038/s41467-019-11876-5> PMID: 31477731
106. Luan W, Hammond LA, Cotter E, Osborne GW, Alexander SA, Nink V, et al. Developmental Vitamin D (DVD) Deficiency Reduces Nurr1 and TH Expression in Post-mitotic Dopamine Neurons in Rat Mesencephalon. *Mol Neurobiol.* 2018; 55(3):2443–2453. <https://doi.org/10.1007/s12035-017-0497-3> PMID: 28365874
107. Montarolo F, Martire S, Perga S, Spadaro M, Brescia I, Allegra S, et al. NURR1 deficiency is associated to ADHD-like phenotypes in mice. *Transl Psychiatry.* 2019; 9(1):207. <https://doi.org/10.1038/s41398-019-0544-0> PMID: 31455763
108. Batool Z, Agha F, Tabassum S, Batool TS, Siddiqui RA, Haider S. Prevention of cadmium-induced neurotoxicity in rats by essential nutrients present in nuts. *Acta Neurobiol Exp (Wars).* 2019; 79(2):169–183. <https://doi.org/10.21307/ane-2019-015> PMID: 31342953
109. Andrieux P, Chevillard C, Cunha-Neto E, Nunes JPS. Mitochondria as a Cellular Hub in Infection and Inflammation. *Int J Mol Sci.* 2021; 22(21). <https://doi.org/10.3390/ijms222111338> PMID: 34768767
110. Ricca C, Aillon A, Bergandi L, Alotto D, Castagnoli C, Silvagno F. Vitamin D Receptor Is Necessary for Mitochondrial Function and Cell Health. *Int J Mol Sci.* 2018; 19(6). <https://doi.org/10.3390/ijms19061672> PMID: 29874855
111. Vanani AR, Mahdavinia M, Shirani M, Alizadeh S, Dehghani MA. Protective effects of quercetin against oxidative stress induced by bisphenol-A in rat cardiac mitochondria. *Environ Sci Pollut Res Int.* 2020; 27(13):15093–15102. <https://doi.org/10.1007/s11356-020-08048-0> PMID: 32064580
112. Wang WW, Han R, He HJ, Li J, Chen SY, Gu Y, et al. Administration of quercetin improves mitochondria quality control and protects the neurons in 6-OHDA-lesioned Parkinson's disease models. *Aging (Albany NY).* 2021; 13(8):11738–11751. <https://doi.org/10.18632/aging.202868> PMID: 33878030
113. Jardim FR, de Rossi FT, Nascimento MX, da Silva Barros RG, Borges PA, Prescilio IC, et al. Resveratrol and Brain Mitochondria: a Review. *Mol Neurobiol.* 2018; 55(3):2085–2101. <https://doi.org/10.1007/s12035-017-0448-z> PMID: 28283884
114. Orlando R, Ginerete RP, Cavalleri L, Aliperti V, Imbriglio T, Battaglia G, et al. Synergic action of L-acetylcarnitine and L-methylfolate in Mouse Models of Stress-Related Disorders and Human iPSC-Derived Dopaminergic Neurons. *Front Pharmacol.* 2022; 13:913210. <https://doi.org/10.3389/fphar.2022.913210> PMID: 35721218
115. Dou M, Gong A, Liang H, Wang Q, Wu Y, Ma A, et al. Improvement of symptoms in a rat model of depression through combined zinc and folic acid administration via up-regulation of the Trk B and NMDA. *Neurosci Lett.* 2018; 683:196–201. <https://doi.org/10.1016/j.neulet.2018.07.036> PMID: 30056106
116. Mlyniec K. Interaction between Zinc, GPR39, BDNF and Neuropeptides in Depression. *Curr Neuropharmacol.* 2021; 19(11):2012–2019. <https://doi.org/10.2174/1570159X19666210225153404> PMID: 33632103
117. Bremner JD, Moazzami K, Wittbrodt MT, Nye JA, Lima BB, Gillespie CF, et al. Diet, Stress and Mental Health. *Nutrients.* 2020; 12(8). <https://doi.org/10.3390/nu12082428> PMID: 32823562
118. Nimmo-Smith V, Merwood A, Hank D, Brandling J, Greenwood R, Skinner L, et al. Non-pharmacological interventions for adult ADHD: a systematic review. *Psychol Med.* 2020; 50(4):529–541. <https://doi.org/10.1017/S0033291720000069> PMID: 32036811
119. Fullen T, Jones S, Emerson L-M, Adamou M. Psychological Treatments in Adult ADHD: A Systematic Review. *Journal of Psychopathology and Behavioral Assessment.* 2020; 42. <https://doi.org/10.1007/s10862-020-09794-8>
120. Sciberras E, Mulraney M, Anderson V, Rapee RM, Nicholson JM, Efron D, et al. Managing Anxiety in Children With ADHD Using Cognitive-Behavioral Therapy: A Pilot Randomized Controlled Trial. *J Atten Disord.* 2018; 22(5):515–520. <https://doi.org/10.1177/1087054715584054> PMID: 25939582
121. Lambez B, Harwood-Gross A, Golombic EZ, Rassovsky Y. Non-pharmacological interventions for cognitive difficulties in ADHD: A systematic review and meta-analysis. *J Psychiatr Res.* 2020; 120:40–55. <https://doi.org/10.1016/j.jpsychires.2019.10.007> PMID: 31629998

122. León-Barriera R, Ortegon RS, Chaplin MM, Modesto-Lowe V. Treating ADHD and Comorbid Anxiety in Children: A Guide for Clinical Practice. *Clin Pediatr (Phila)*. 2023; 62(1):39–46. <https://doi.org/10.1177/00099228221111246> PMID: 35854648
123. Moghadas M, Essa MM, Ba-Omar T, Al-Shehi A, Qoronfleh MW, Eltayeb EA, et al. Antioxidant therapies in attention deficit hyperactivity disorder. *Front Biosci (Landmark Ed)*. 2019; 24(2):313–333. <https://doi.org/10.2741/4720> PMID: 30468658
124. Pandya CD, Howell KR, Pillai A. Antioxidants as potential therapeutics for neuropsychiatric disorders. *Prog Neuropsychopharmacol Biol Psychiatry*. 2013; 46:214–223. <https://doi.org/10.1016/j.pnpbp.2012.10.017> PMID: 23123357
125. Hinshaw SP. Attention Deficit Hyperactivity Disorder (ADHD): Controversy, Developmental Mechanisms, and Multiple Levels of Analysis. *Annu Rev Clin Psychol*. 2018; 14:291–316. <https://doi.org/10.1146/annurev-clinpsy-050817-084917> PMID: 29220204
126. National Guideline C. NICE Evidence Reviews Collection. Evidence review(s) for efficacy of non-pharmacological treatment and the impact of adverse events associated with non-pharmacological treatments of ADHD: Attention deficit hyperactivity disorder: diagnosis and management: Evidence review E. London: National Institute for Health and Care Excellence (NICE) Copyright © NICE 2018.; 2018.
127. Shim SR, Kim SJ, Lee J, Rücker G. Network meta-analysis: application and practice using R software. *Epidemiol Health*. 2019; 41:e2019013. <https://doi.org/10.4178/epih.e2019013> PMID: 30999733
128. Higgins JP, Thompson SG, Deeks JJ, Altman DG. Measuring inconsistency in meta-analyses. *BMJ*. 2003 Sep 6; 327(7414):557–60. <https://doi.org/10.1136/bmj.327.7414.557> PMID: 12958120
